# Supplementary material
Source: Royal Society of Chemistry journal article supplement (doi:10.1039/d6gc00309e)
Supplement: d6gc00309e1.pdf [file d6gc00309e1.pdf]

## Supplementary material for Evaluating the Sustainability of Electrochemical CO<sub>2</sub> Capture Technology through LCA and LCC: A Winery Industry Application

Prince Sungdewie Adama Nopuo, Javiera Francisca Gutiérrez-Espinoza, Carmen M. Fernández-Marchante, Pedro M. Izquierdo-Cañas, Esteban García, Manuel A. Rodrigo Rodrigo, Justo Lobato\*

An emerging alternative to amine scrubbing is the use of electrochemically produced sodium hydroxide to fix CO<sub>2</sub> as carbonate. The mechanism of this process is based on the fact that in a wet alkaline medium, CO<sub>2</sub> is physically absorbed and instantly reacts with NaOH according to the reaction pathways presented in equations 1-3 [7].

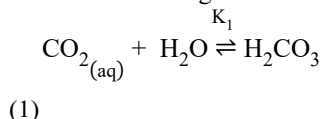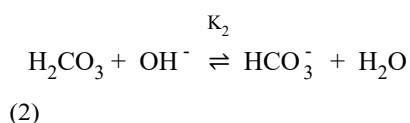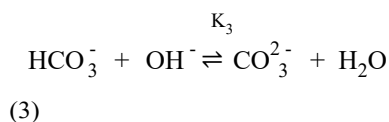

In a highly alkaline medium (excess NaOH), reaction 3 is carried out immediately after reaction 2, resulting in the formation of sodium carbonate as the product. However, for prolonged capture, NaOH becomes limiting, and the reverse of reaction 3 sets in, producing sodium bicarbonate as the product.

The EDEN technology is designed to operate in both electrolysis and fuel-cell modes. The electrolysis reactions involve anodic oxidation of water to oxygen (Equation (4)) and oxidation of chloride ions to chlorine gas (Equation (5)). Chlorine may undergo chemical disproportionation to hypochlorous acid (Equation (7)) after dissolving in water (Equation (6)), which can then dissociate into hypochlorite ions (Equation (6)). The cathode reduces water to hydrogen and hydroxide ions (Equation (9)). Also, chlorine generated at the anode can be reduced at the cathode due to crossover, potentially competing with water reduction and producing chloride ions [9].

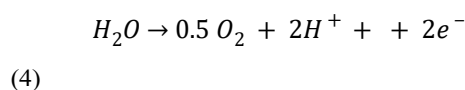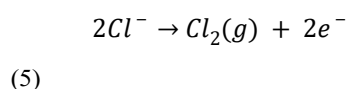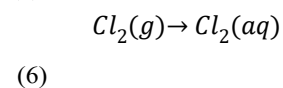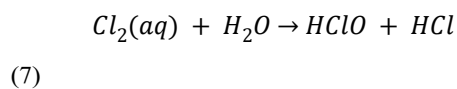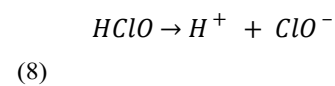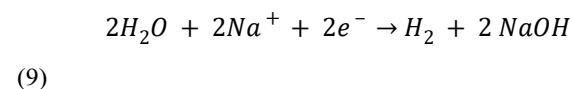

Table S1: Material selection for each scenario studied.

| FU = 1 g CO <sub>2</sub> Captured                                                |                                                                                                               |                                                                                  | Unit    | Material Quantity | Material Quantity per FU | Scenarios |   |   |   |   |
|----------------------------------------------------------------------------------|---------------------------------------------------------------------------------------------------------------|----------------------------------------------------------------------------------|---------|-------------------|--------------------------|-----------|---|---|---|---|
| Module                                                                           | Component                                                                                                     | Material Selected in SimaPro                                                     |         |                   |                          | 1         | 2 | 3 | 4 | 5 |
| <b>Materials (Manufacturing + Processing)</b>                                    |                                                                                                               |                                                                                  |         |                   |                          |           |   |   |   |   |
| Electrolyzer                                                                     | Cathode                                                                                                       | Titanium, {GLO} market for titanium   Cut-off, U                                 | g       | 6.159             | 3.33E-04                 | ✓         | ✓ | ✓ | ✓ | X |
|                                                                                  | Anode electrode, Cell C                                                                                       | Titanium, {GLO} market for titanium   Cut-off, U                                 | g       | 1.547             | 8.35E-05                 | ✓         | X | ✓ | X | X |
|                                                                                  |                                                                                                               | Carbon black, {GLO} market for carbon black   Cut-off, U                         | g       | 0.042             | 2.27E-06                 |           |   |   |   |   |
|                                                                                  |                                                                                                               | Rhodium, {GLO} market for rhodium   Cut-off, U, <b>for Ruthenium catalyst</b>    | g       | 0.007             | 3.82E-07                 |           |   |   |   |   |
|                                                                                  |                                                                                                               | Platinum, {GLO} market for platinum   Cut-off, U, <b>for Platinum (catalyst)</b> | g       | 0.006             | 3.38E-07                 |           |   |   |   |   |
|                                                                                  |                                                                                                               | Tetrafluoroethylene, {GLO} market for tetrafluoroethylene   Cut-off, U           | g       | 0.003             | 1.73E-07                 |           |   |   |   |   |
|                                                                                  | Anode electrode, Cell B                                                                                       | Titanium, {GLO} market for titanium   Cut-off, U, <b>for Titanium Sheet</b>      | g       | 10.613            | 5.73E-04                 | X         | ✓ | X | ✓ | X |
| Rhodium, {GLO} market for rhodium   Cut-off, U, <b>for Ruthenium catalyst</b>    |                                                                                                               | g                                                                                | 0.064   | 3.46E-06          |                          |           |   |   |   |   |
| Platinum, {GLO} market for platinum   Cut-off, U, <b>for Platinum (catalyst)</b> |                                                                                                               | g                                                                                | 0.043   | 2.30E-06          |                          |           |   |   |   |   |
| Titanium, {GLO} market for titanium   Cut-off, U, <b>for Titanium (catalyst)</b> |                                                                                                               | g                                                                                | 0.427   | 2.30E-05          |                          |           |   |   |   |   |
| Membrane (Nafion)                                                                | Tetrafluoroethylene, {GLO} market for tetrafluoroethylene   Cut-off, U                                        | g                                                                                | 1.676   | 9.05E-05          | ✓                        | ✓         | ✓ | ✓ | X |   |
|                                                                                  | Sulfuric acid, {RER} market for sulfuric acid   Cut-off, U                                                    | g                                                                                | 0.419   | 2.26E-05          |                          |           |   |   |   |   |
| Gasket                                                                           | Silicone product, {RER} market for silicone product   Cut-off, U                                              | g                                                                                | 38.426  | 2.08E-03          | ✓                        | ✓         | ✓ | ✓ | X |   |
| Screws support                                                                   | Steel, stainless 304, {RNA} quarto plate                                                                      | g                                                                                | 91.176  | 4.92E-03          | ✓                        | ✓         | ✓ | ✓ | X |   |
| Screws                                                                           | Polyethylene terephthalate, {GLO} market for polyethylene terephthalate, granulate, bottle grade   Cut-off, U | g                                                                                | 25.176  | 1.36E-03          | ✓                        | ✓         | ✓ | ✓ | X |   |
| End and Bipolar                                                                  | Methyl methacrylate, {RER} market for methyl methacrylate   Cut-off, U                                        | g                                                                                | 143.210 | 7.73E-03          | ✓                        | ✓         | ✓ | ✓ | ✓ |   |

|                         |                 |                                                                                                                                                                                |     |         |          |   |   |   |   |      |
|-------------------------|-----------------|--------------------------------------------------------------------------------------------------------------------------------------------------------------------------------|-----|---------|----------|---|---|---|---|------|
|                         | Plates          | Methyl methacrylate, {RER} market for methyl methacrylate   Cut-off, U                                                                                                         | g   | 48.251  | 2.61E-03 |   |   |   |   |      |
| Storage and Connections | Pipes           | Silicone product, {RER} market for silicone product   Cut-off, U                                                                                                               | g   | 91.1    | 4.92E-03 | ✓ | ✓ | ✓ | ✓ | (x1) |
|                         | Tanks (2)       | Methyl methacrylate, {RER} market for methyl methacrylate   Cut-off, U                                                                                                         | g   | 469.389 | 5.07E-03 |   |   |   |   | ✓    |
|                         |                 | Methyl methacrylate, {RER} market for methyl methacrylate   Cut-off, U                                                                                                         | g   | 158.150 | 1.71E-03 |   |   |   |   |      |
| Compressor              | Screws          | Steel, stainless 304, {RNA} quarto plate                                                                                                                                       | g   | 32.123  | 5.01E-05 | ✓ | ✓ | ✓ | ✓ | ✓    |
|                         | Pipes           | Silicone product, {RER} market for silicone product   Cut-off, U                                                                                                               | g   | 14.231  | 3.14E-05 |   |   |   |   |      |
|                         | Casing          | Polycarbonate, granulate, {GLO} market for   Cut-off, U                                                                                                                        | g   | 69.721  | 1.23E-04 |   |   |   |   |      |
|                         | Electronics     | Electronics, for control units, {GLO} market for   Cut-off, U                                                                                                                  | g   | 215.121 | 3.63E-04 |   |   |   |   |      |
| Pump(x2)                | Screws          | Steel, {RNA} stainless 304, quarto plate                                                                                                                                       | g   | 29.888  | 4.91E-05 | ✓ | ✓ | ✓ | ✓ | (x1) |
|                         | Pipes           | Silicone product, {RER} market for silicone product   Cut-off, U                                                                                                               | g   | 17.682  | 2.91E-05 |   |   |   |   | ✓    |
|                         | Casing          | Polycarbonate, granulate, {GLO} market for   Cut-off, U                                                                                                                        | g   | 68.052  | 1.12E-04 |   |   |   |   |      |
|                         | Electronics     | Electronics, for control units, {GLO} market for   Cut-off, U                                                                                                                  | g   | 208.358 | 3.43E-04 |   |   |   |   |      |
| DC power supply         | DC power supply | Steel, chromium steel 18/8 {GLO} market for   Cut-off, U                                                                                                                       | g   | 332.270 | 5.46E-04 | ✓ | ✓ | ✓ | ✓ | ✓    |
|                         |                 | Cable, unspecified {GLO} market for   Cut-off, U                                                                                                                               | g   | 92.593  | 1.52E-04 |   |   |   |   |      |
|                         |                 | Polyethylene, high-density, granular {GLO} market for   Cut-off, U                                                                                                             | g   | 934.053 | 1.54E-03 |   |   |   |   |      |
|                         |                 | Electronics, for control units, {GLO} market for   Cut-off, U                                                                                                                  | g   | 41.884  | 6.89E-05 |   |   |   |   |      |
| Absorption Column       | Plastic body    | Polyethylene terephthalate, {GLO} market for polyethylene terephthalate, granulate, bottle grade   Cut-off, U                                                                  | g   | 618.48  | 3.67E-03 | X | X | ✓ | ✓ | ✓    |
|                         |                 | Ethylene glycol, {RER} market for ethylene glycol   Cut-off, U                                                                                                                 | g   | 68.72   | 4.08E-04 |   |   |   |   |      |
|                         | Sphere glass    | Glass tube, borosilicate, {GLO} market for glass tube, borosilicate   Cut-off, U                                                                                               | g   | 2000    | 1.19E-02 |   |   |   |   |      |
|                         | Screws          | Steel, {RNA} stainless 304, quarto plate                                                                                                                                       | g   | 467.5   | 2.78E-03 |   |   |   |   |      |
|                         | Gasket          | Silicone product, market for silicone product   Cut-off, U                                                                                                                     | g   | 34.7    | 2.06E-04 |   |   |   |   |      |
| <b>Operation</b>        |                 |                                                                                                                                                                                |     |         |          |   |   |   |   |      |
| Feedstock               | Electrolyte     | Sodium chloride, brine solution, {GLO} market for sodium chloride, brine solution   Cut-off, U                                                                                 | g   |         | 24.57    | ✓ | ✓ | ✓ | ✓ | X    |
|                         | Solvent         | Neutralising agent, sodium hydroxide-equivalent, {RER} sodium hydroxide to the generic market for neutralising agent   Cut-off, U                                              | g   |         | 2.27     | X | X | X | X | ✓    |
| Energy Source           | Electricity     | Photovoltaic module, building-integrated, for slanted-roof installation {RER}  photovoltaic module production, building-integrated, for slanted-roof installation   Cut-off, U | kWh |         | 4.74E-03 | ✓ | ✓ | X | X | X    |
|                         |                 |                                                                                                                                                                                |     |         | 7.81E-03 | X | X | ✓ | ✓ | X    |
|                         |                 |                                                                                                                                                                                |     |         | 2.32E-04 | X | X | X | X | ✓    |

**Table S2:** Electricity prices, emission factors, and emissions prices considered (sourced from Ecoinvent database).

| Electricity source | Price, | Emission factor | Emissions price |
|--------------------|--------|-----------------|-----------------|
|--------------------|--------|-----------------|-----------------|

|                        | €/kWh  | (kg CO <sub>2</sub> /kWh) | (€/t CO <sub>2</sub> -eq) |
|------------------------|--------|---------------------------|---------------------------|
| Italy grid mix         | 0.195  | 0.35                      | 65                        |
| Chile grid mix         | 0.11   | 0.51                      | 4.6                       |
| Spain grid mix         | 0.17   | 0.21                      | 65                        |
| France grid mix        | 0.171  | 0.09                      | 65                        |
| California grid mix    | 0.065  | 0.38                      | 40                        |
| Spain's solar energy   | 0.05   | 0.07                      | 65                        |
| Spain wind energy      | 0.04   | 0.01                      | 65                        |
| Spain's nuclear energy | 0.1    | 0.01                      | 65                        |
| Off-grid solar (Spain) | 0.0073 | 0.006                     | 65                        |

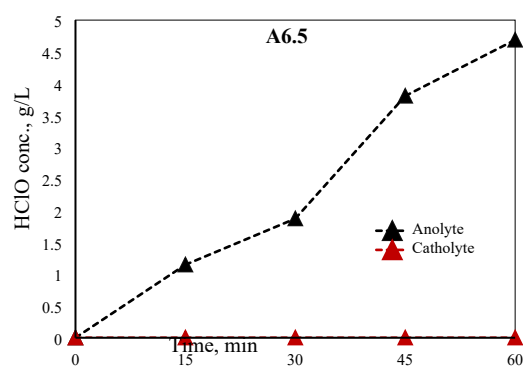

Figure S1. Time course formation of HClO in the catholyte and anolyte

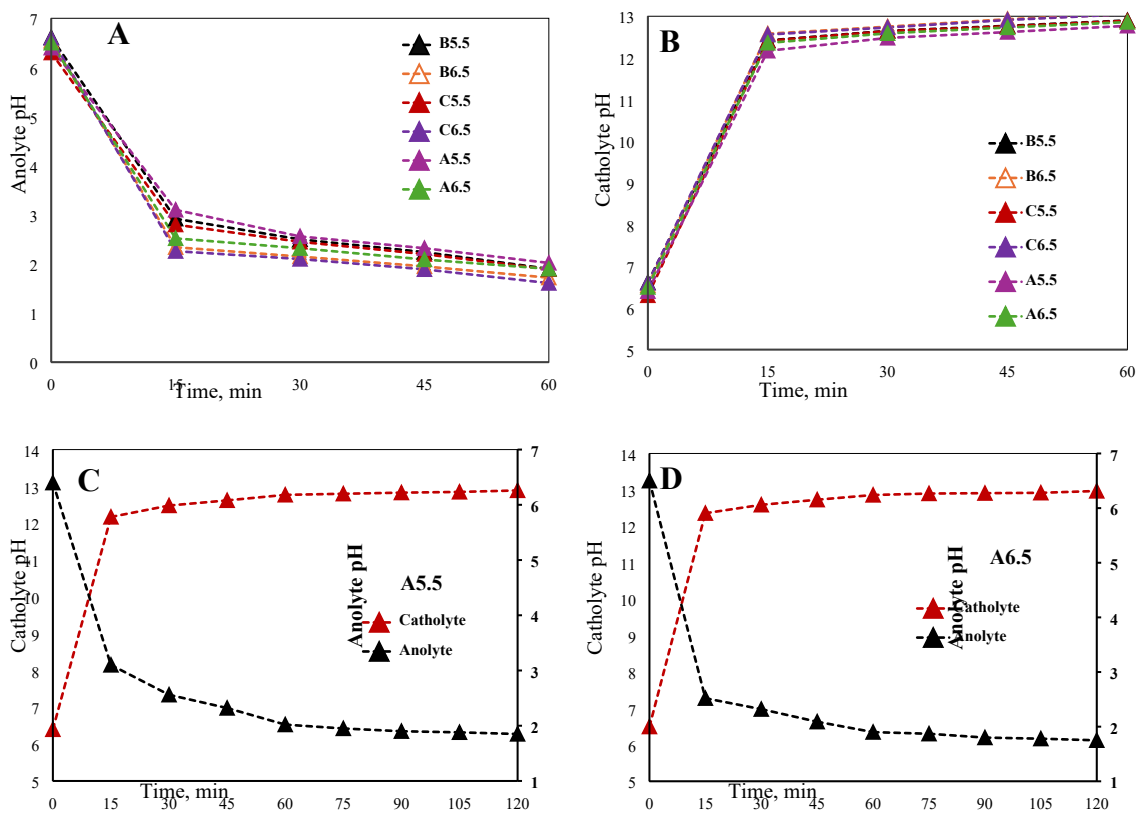

Figure S2. Time course of electrolytes pH trend: (A) anolyte and (B) catholyte for short duration, (C) Catholyte and (D) anolyte for longer duration.

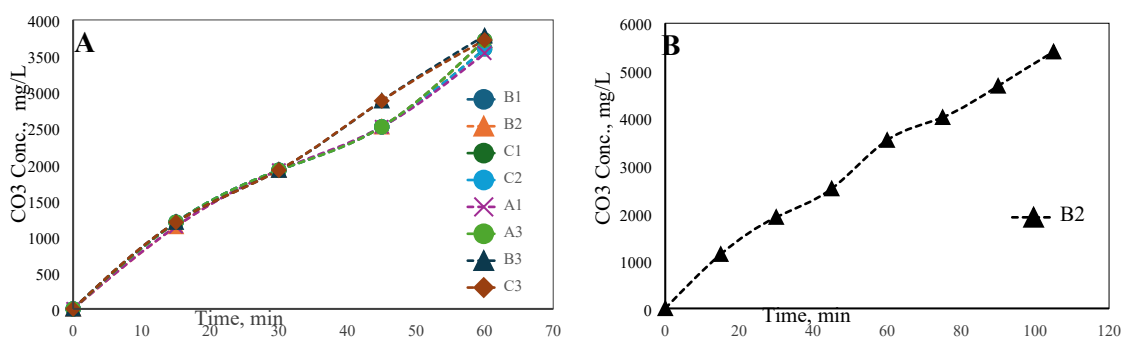

Figure S3. Time course of carbonate formation during electro-absorption of CO<sub>2</sub> at 15 mL/min: (A) Comparison of different tested conditions and (B) 120 minutes of CO<sub>2</sub> absorption considering conditions of B2.

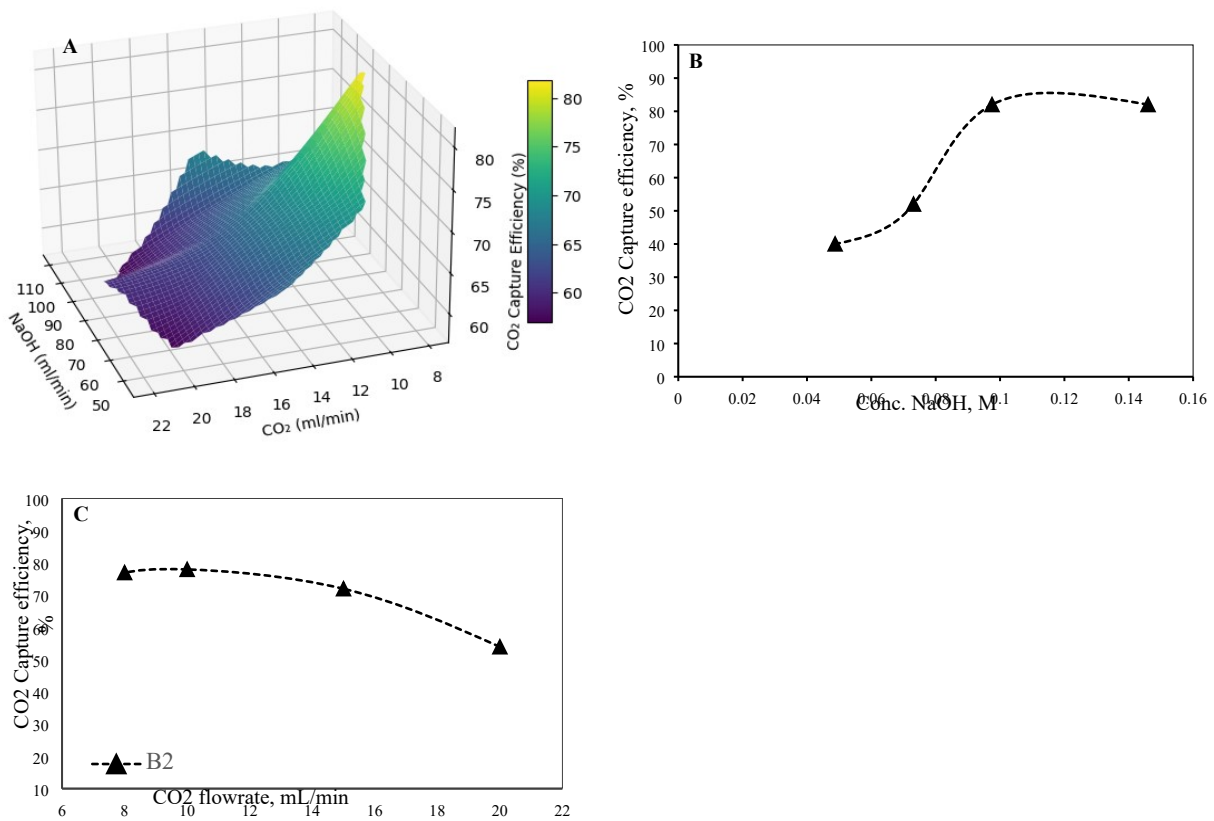

Figure S4: Optimization of studied variables, (A) influence of NaOH flow rate and CO<sub>2</sub> flow rate on the capture efficiency in column absorption, (B) influence of NaOH concentration on the capture efficiency in column absorption, (C) influence of CO<sub>2</sub> flow rate on the capture efficiency in electro-absorption.

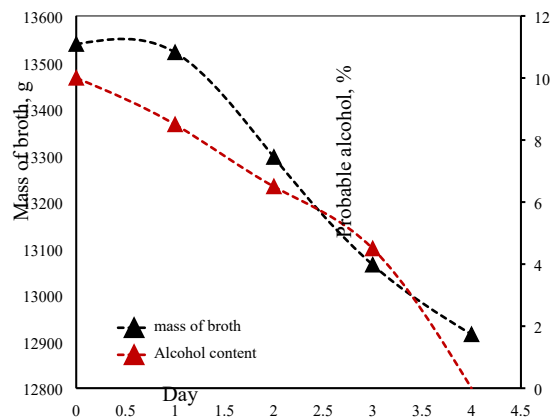

Figure S5. Daily profiles of mass and probable alcohol content of the fermentation broth.

Table S3: Composition of fermentation broth (wine sample) before and after fermentation.

| Sampling Description              | pH   | °Brix | Total Acidity (g/L) | Malic Acid (g/L) | Lactic Acid (g/L) | Acetic Acid (g/L) | Citric Acid (g/L) | Tartaric Acid (g/L) | Succinic Acid (g/L) | Glycerol (g/L) | Glucose + Fructose (g/L) | Alcohol (% v/v) |
|-----------------------------------|------|-------|---------------------|------------------|-------------------|-------------------|-------------------|---------------------|---------------------|----------------|--------------------------|-----------------|
| Initial sample (unfermented must) | 3.10 | 16.64 | 5.60                | 1.91             | –                 | –                 | 3.39              | 1.79                | –                   | –              | 154.00                   | 0.30            |

| Sampling Description            | pH   | °Brix | Total Acidity (g/L) | Malic Acid (g/L) | Lactic Acid (g/L) | Acetic Acid (g/L) | Citric Acid (g/L) | Tartaric Acid (g/L) | Succinic Acid (g/L) | Glycerol (g/L) | Glucose + Fructose (g/L) | Alcohol (% v/v) |
|---------------------------------|------|-------|---------------------|------------------|-------------------|-------------------|-------------------|---------------------|---------------------|----------------|--------------------------|-----------------|
| Final sample after fermentation | 3.09 | –     | 7.40                | 1.66             | 0.16              | –                 | 3.52              | 1.97                | 0.66                | 5.09           | 0.18                     | 8.40            |

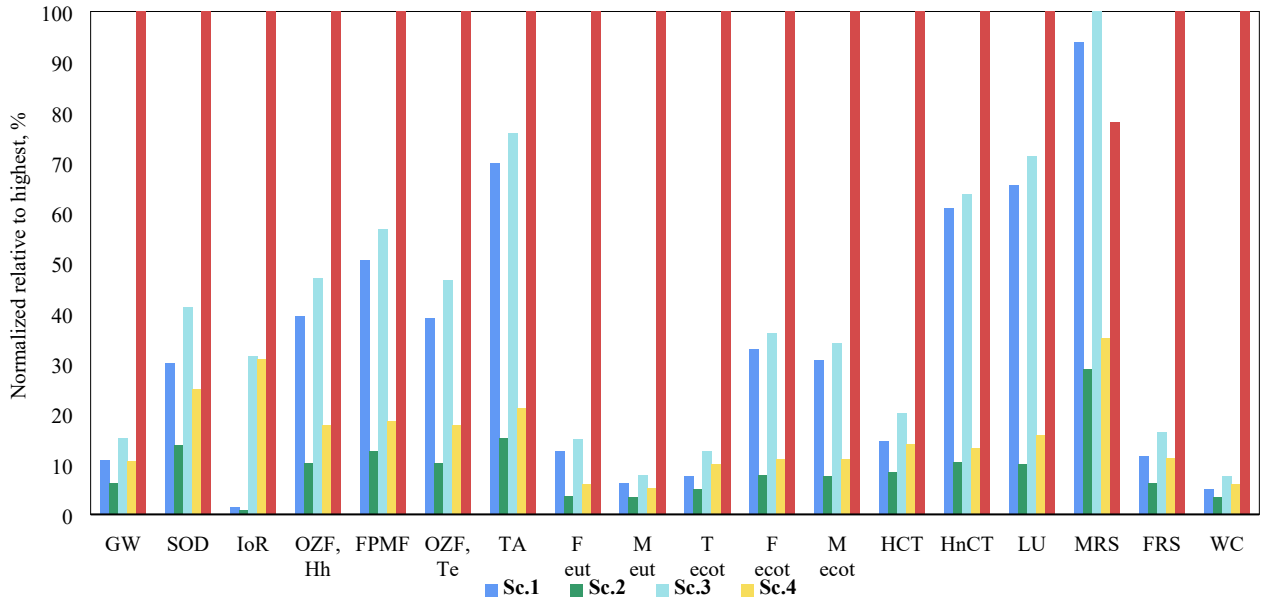

Figure S6. Recipe Midpoint results for the studied CO<sub>2</sub> capture scenarios.
